# Supplementary material
Source: Springer Nature journal article supplement (https://www.springermedizin.de/resource/supplementary/13054_2012_1673_MOESM3_ESM.pdf/9711178)

**A**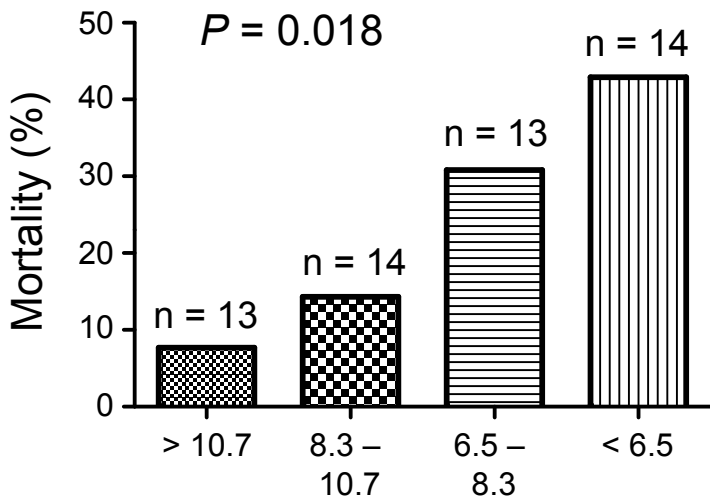

Day 1 kallistatin quartile levels ( $\mu\text{g/mL}$ )

**B**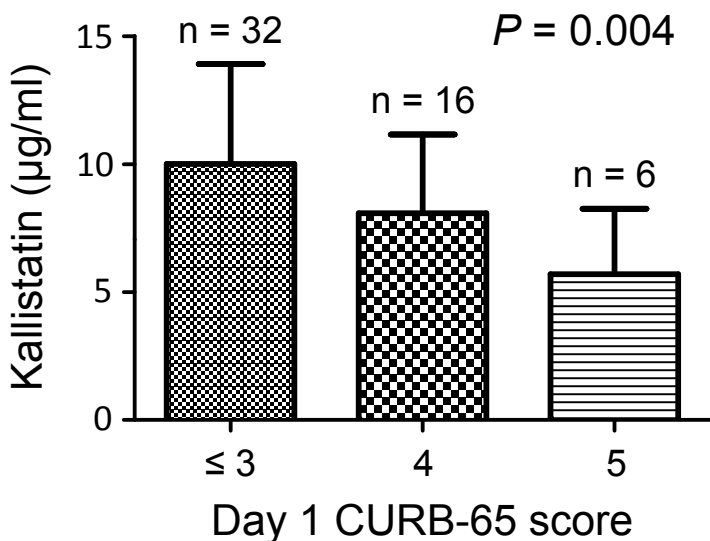

Supplement: MOESM3 [file 9711178]
